# Supplementary material
Source: PubMed Central journal article supplement (PMC7642110)

## Supplementary Tables

**Table 1. Primers for PCR amplification for CRISPR/Cas9 mouse models**

| Primer                | Primer sequence (5'-3')                                                | Purpose                           |
|-----------------------|------------------------------------------------------------------------|-----------------------------------|
| T7-sgRNA F(S186A)1    | <b>ttaatcgactcactatagg</b> AAGCAGCTGTC<br>GGAAGACCTgtttagagctagaaatagc | In vitro transcription<br>sgRNA   |
| T7-sgRNA F(S186A)2    | <b>ttaatcgactcactatagg</b> TTCCGACAGCT<br>GCTTTCGCTgtttagagctagaaatagc |                                   |
| T7-sgRNA R            | AAAAGCACCGACTCGGTGCC                                                   | In vitro transcription<br>sgRNA   |
| T7-Cas9 F (for px330) | <b>ttaatcgactcactatag</b> GGAGAATGGAC<br>TATAAGGACCACGAC               | In vitro transcription<br>of Cas9 |
| T7-Cas9 R (for px330) | GCGAGCTCTAGGAATTCTTAC                                                  |                                   |

**Table 2. ssODN oligos**

|                    | Forward                                                                                                                             |
|--------------------|-------------------------------------------------------------------------------------------------------------------------------------|
| ssODN-1<br>(S186A) | AGTCAAATATGGTTCCAGAACAGACGCTATAAGACCAAGCGAA<br>AGCAGCTGGCGGAAGACCTGGGAGTCTTGGAGAAGAAGCACTCACCA<br>TTGTCTTTGCCAGCCCTGAAAGATGACAGCCTG |

**Table 3. Primers for genotyping of mouse mutation**

|           | <b>Forward</b>             | <b>Reverse</b>               |
|-----------|----------------------------|------------------------------|
| S186A     | TGGAGAGGAAGTTCAGCC         | CTTCCGACTCCTTGACATC          |
| Nkx3.1+/- | TTCCACATACTTCATTCT<br>CAGT | GCCAACCTGCCTCAATCACTAAG<br>G |

**Table 4. Antibodies used for immunofluorescence staining**

| <b>Antigen</b>    | <b>Supplier</b>             | <b>Ig type</b> | <b>Dilution</b> |
|-------------------|-----------------------------|----------------|-----------------|
| Nkx3.1            | Athena #0315                | Rabbit IgG     | 1:200           |
| $\beta$ -catenin  | BD transduction lab #610153 | Mouse IgG      | 1:500           |
| Ki-67             | eBioscience #14-5698-82     | Rat IgG        | 1:100           |
| CK5               | BioLegend #905901           | Chicken IgG    | 1:500           |
| CK8               | Abcam #                     | Rabbit IgG     | 1:400           |
| $\gamma$ H2AX     | Millipore #05-636           | Mouse IgG      | 1:1000          |
| pATM (pS1981)     | Rockland #200-301-400       | Mouse IgG      | 1:1000          |
| 53BP1             | Cell Signaling #4937        | Rabbit IgG     | 1:500           |
| Nitrotyrosine     | Millipore #06-284           | Rabbit IgG     | 1:50            |
| 8-oxoG            | Millipore #MAB3560          | Mouse IgG      | 1:250           |
| pS6               | Cell Signaling #2211S       | Rabbit IgG     | 1:1000          |
| OGG1              | Santa Cruz                  | SC-33181       | 1:50            |
| Cleaved caspase 3 | Cell Signaling #D3E9        | Rabbit IgG     | 1:200           |

## Supplementary Figure 1

A. Amino acid sequences of human (top) and murine (bottom) NKX3.1 showing consensus (central) sequence and location of serine 185 and 186 indicated by the box in the figure.

B. Effect of S186A mutation on half-life of murine Nkx3.1.

### A

```

1  MLRVPEPRPGEAKAEG----AAPPTPSKPLTSFLIQDILRDGAQRQGGRTSS-QRQRDPE 55
   MLRV EPR  +A G  AAPPT SK LTSFLIQDILRD A+R GG + + Q  DP
1  MLRVAEPREPRVEAGGRSPWAAPPTQSKRLTSFLIQDILRDRAERHGGHSGNPQHSPDPR 60

56  PEPEPEPEGGRSRAGAQNQLSTGPRAAPDEAETLAETEPERHLGSYLLDSENTSGALPR 115
   + PEP+  R A D S  R +P AET E E + H +YLLD E+  G L
61  RDSAPEPKAGGRGVAPEDPPSI--RHSP--AETPTEPESDAHFETYLLDCEHMPGDLAS 116

116 LPQTPKQPQKRSRAAFSHTQVIELERKFSHQKYL SAPERAH LAKNLKLTETQVKIWFQNR 175
   PQ  KQPQKRSRAAFSHTQVIELERKFSHQKYL SAPERAH LAKNLKLTETQVKIWFQNR
117 APQVTKQPQKRSRAAFSHTQVIELERKFSHQKYL SAPERAH LAKNLKLTETQVKIWFQNR 176

176 RYKTKRKQLSSELGDLEKHS--SLPALKEEAFSRASLVSVYNSYPYPYPYLHCVGSWSPAF 233
   RYKTKRKQLS +LG LEK+S  SLPALK+++  SLVSVY SYPYPYPYL+C+GSW P+F
177 RYKTKRKQLSEDLGVLEKNSPLSLPALKDDSLPSTSLVSVYTSYPYPYPYLYCLGSWHPSF 236

234 W 234
     W
237 W 237
  
```

### B

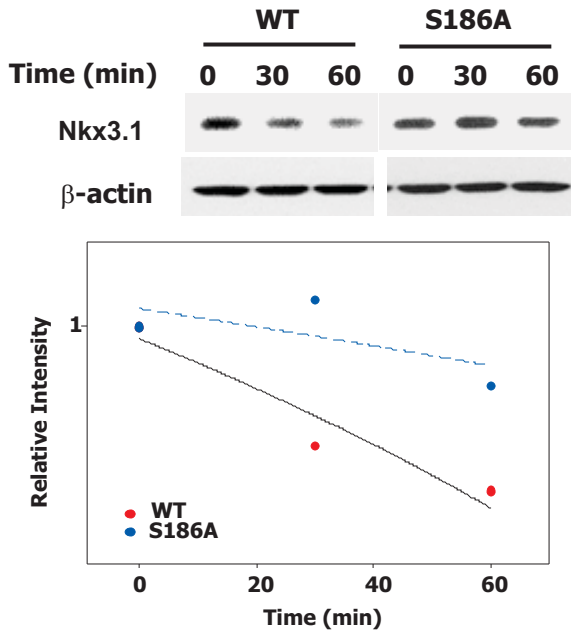

## Supplementary Figure 2

A. Schematic of targeted sites for mutation at *Nkx3.1* locus.

B. Germline transmission of the *Nkx3.1*(S186A) mutation generated using CRISPR/Cas9 genome engineering. PCR was performed with genotyping primer pairs (Supplementary Table 3). PCR products were incubated with 0.4 unit of *EciI* at 37deg C for 1 hour and visualized on a 2% agarose gel.

### A. S186A2 mutation (sgRNA2)

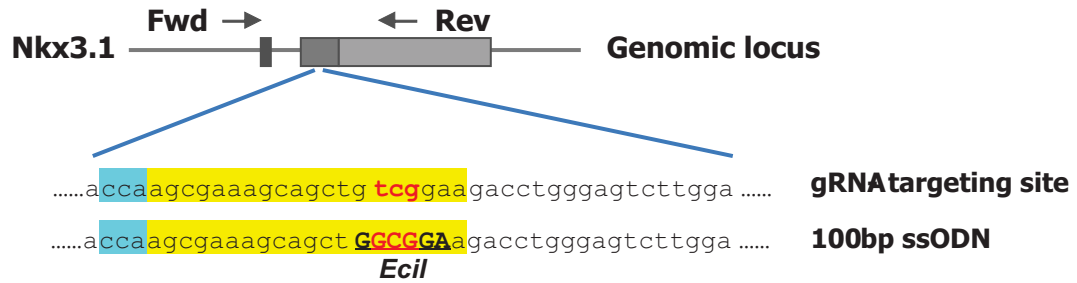

**sgRNA sequence**

**PAM motif**

**NNN mutation sites**

**UPPERCASE: restriction enzyme cutting site for genotyping**

### B.

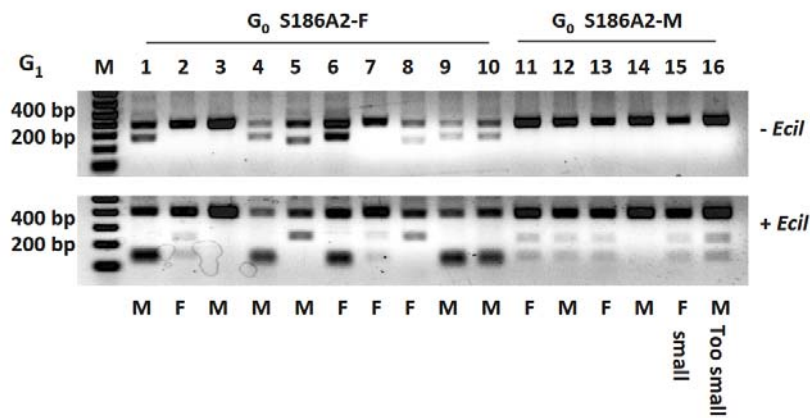

WT 5' AGACGCTATAAGACCAAGCGAAAGCAGCTG**TCG**GAAGACCT**GGG**AGTCTTGGAGAAGA 3'

| Number of mice | gS186A2-G1 sequence                                                                                                                                                                                       | Deletion |
|----------------|-----------------------------------------------------------------------------------------------------------------------------------------------------------------------------------------------------------|----------|
| 2 11 12 13     | 5' AGACGCTATAAGACCAAGCGAAAGCAGCTG <b>GCG</b> GAAGACCT <b>GGG</b> AGTCTTGGAGAAGA 3'                                                                                                                        |          |
| 4 6 9 10       | 5' AGACGCTATAAGACCAAGCGAAAGCAGCTG <b>GCG</b> GAAGAC----- 3'                                                                                                                                               | -111 bp  |
| 5              | 5' AGACGCTATAAGACCAAGCGAAAGCAGCTG----- 3'                                                                                                                                                                 | -158 bp  |
| 7              | 5'AGACGCTATAAGACCAAGCGAAAGCAGCTG <b>GCG</b> GAAGACCT <b>GGG</b> AGTCTTGGAGAAGAA<br>CTCAcATTGTCTTTGCCAGCCCTGAAAGATGACAGCCTGCCAGTACCTCCTTGGTCTCCG<br>TGTATACTAGCTATCCCTACTACCCCTAC-TGTACTGTCTGTACTGTACTG 3' |          |

### Supplementary Fig 3

A. H&E staining of dorsolateral prostatic lobes at different time points. Results similar to those seen with anterior prostates are shown in the figure.

B. H&E staining of anterior (AP) and dorsolateral (DLP) prostatic lobes at 400x demonstrating the progression of cytologic abnormalities over time in *Nkx3.1<sup>+/-</sup>* mice.

C. High-power image of H&E staining of anterior prostatic lobe at 10 months of age from mice of the indicated genotype. Note the architectural and cytologic disruption in *NKX3.1<sup>+/-</sup>* mice.

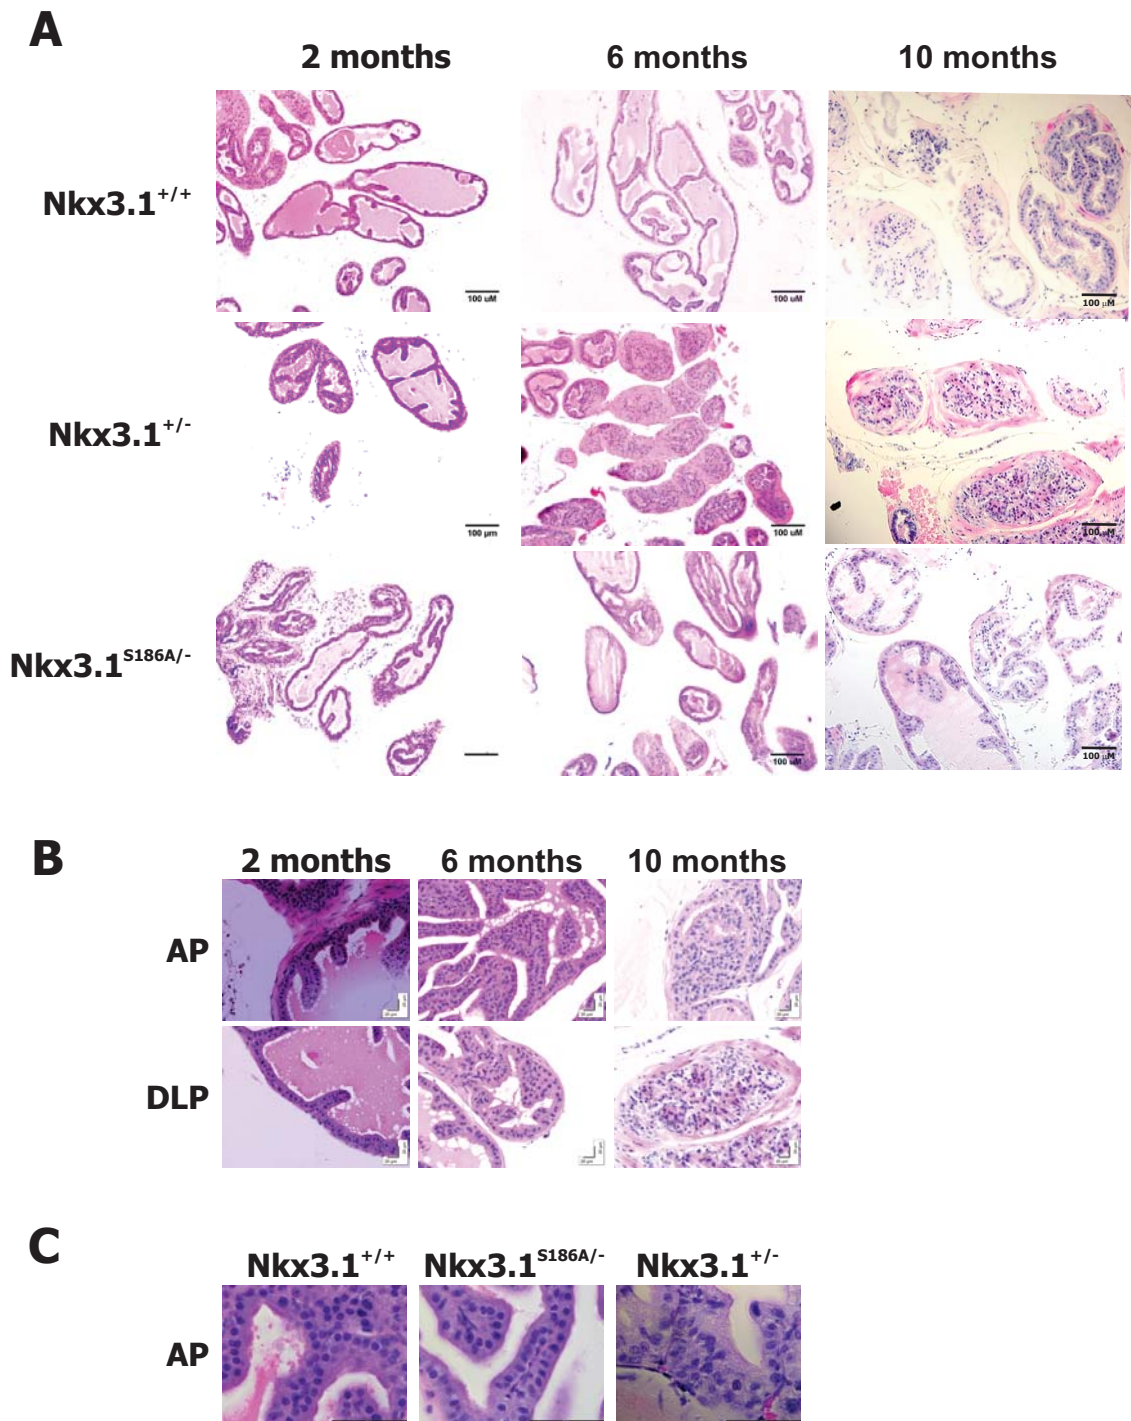

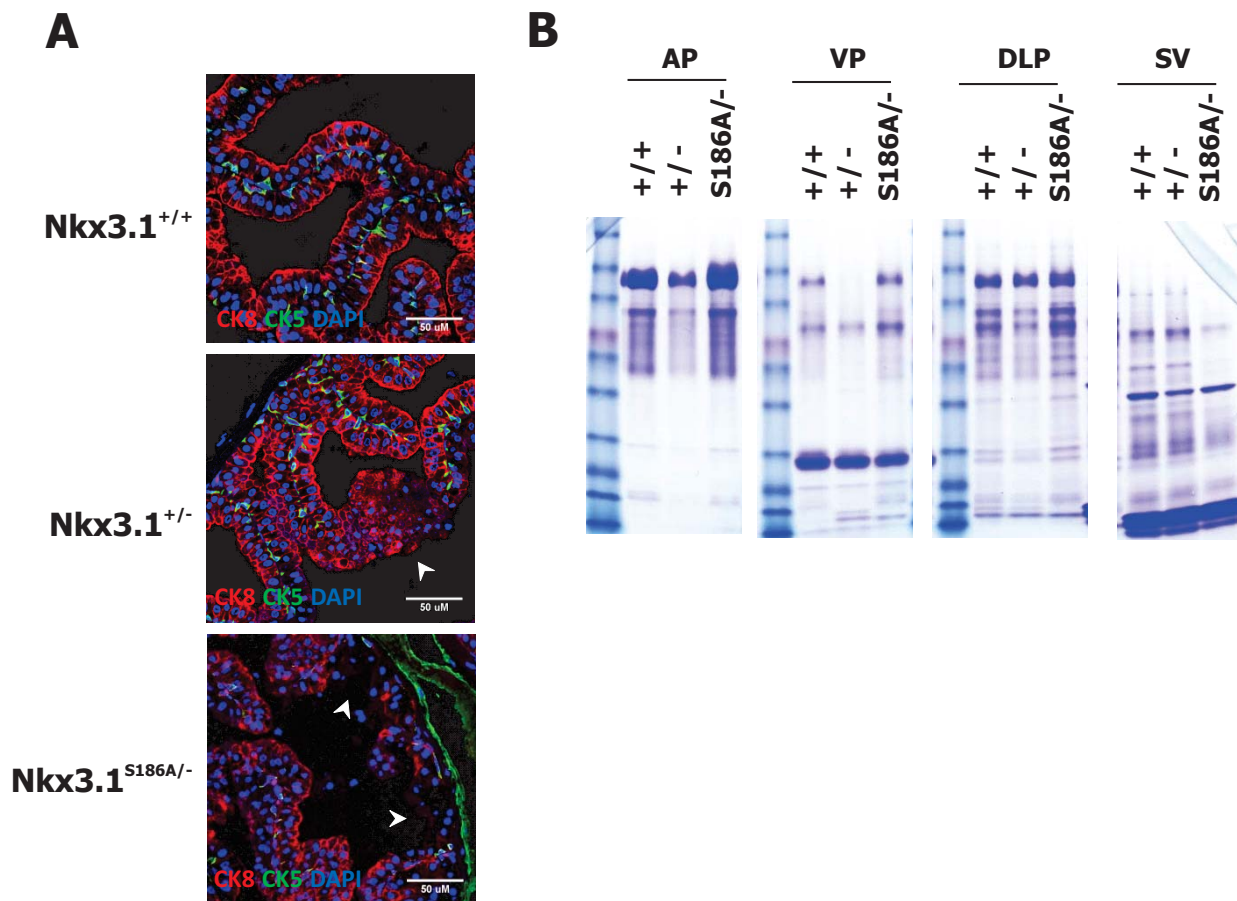

### Supplementary Fig 4

- A. Immunohistochemistry for cytokeratins 5 and 8 in 2-month old anterior prostate lobes. The arrow in the section from *Nkx3.1*<sup>+/+</sup> show an area of early hyperplasia. The arrows in the section from *Nkx3.1*<sup>S186A/-</sup> show areas of epithelial detachment.
- B. Polyacrylamide gel separation of Coomassie blue-stained proteins from prostate lobes and seminal vesicle from mice of three genotypes as indicated.

### Supplementary Figure 5

Nkx3.1 expression. Nkx3.1 was detected in paraffin sections from dorsolateral prostate lobes of Nkx3.1<sup>+/+</sup>, Nkx3.1<sup>+/-</sup>, and Nkx3.1<sup>S186A/-</sup> mice

at 2, 6, and 10 months of age. Counter stain was done with

antibody to  $\beta$ -catenin and DAPI. Confocal images were quantitated

with image J and Nkx3.1 expression was plotted relative to

adjacent  $\beta$ -catenin expression. Relative intensity of Nkx3.1 expression in Nkx3.1<sup>S186A/-</sup> mice differed from both Nkx3.1<sup>+/+</sup> and Nkx3.1<sup>+/-</sup> mice by t-test with  $p < 0.01$ .

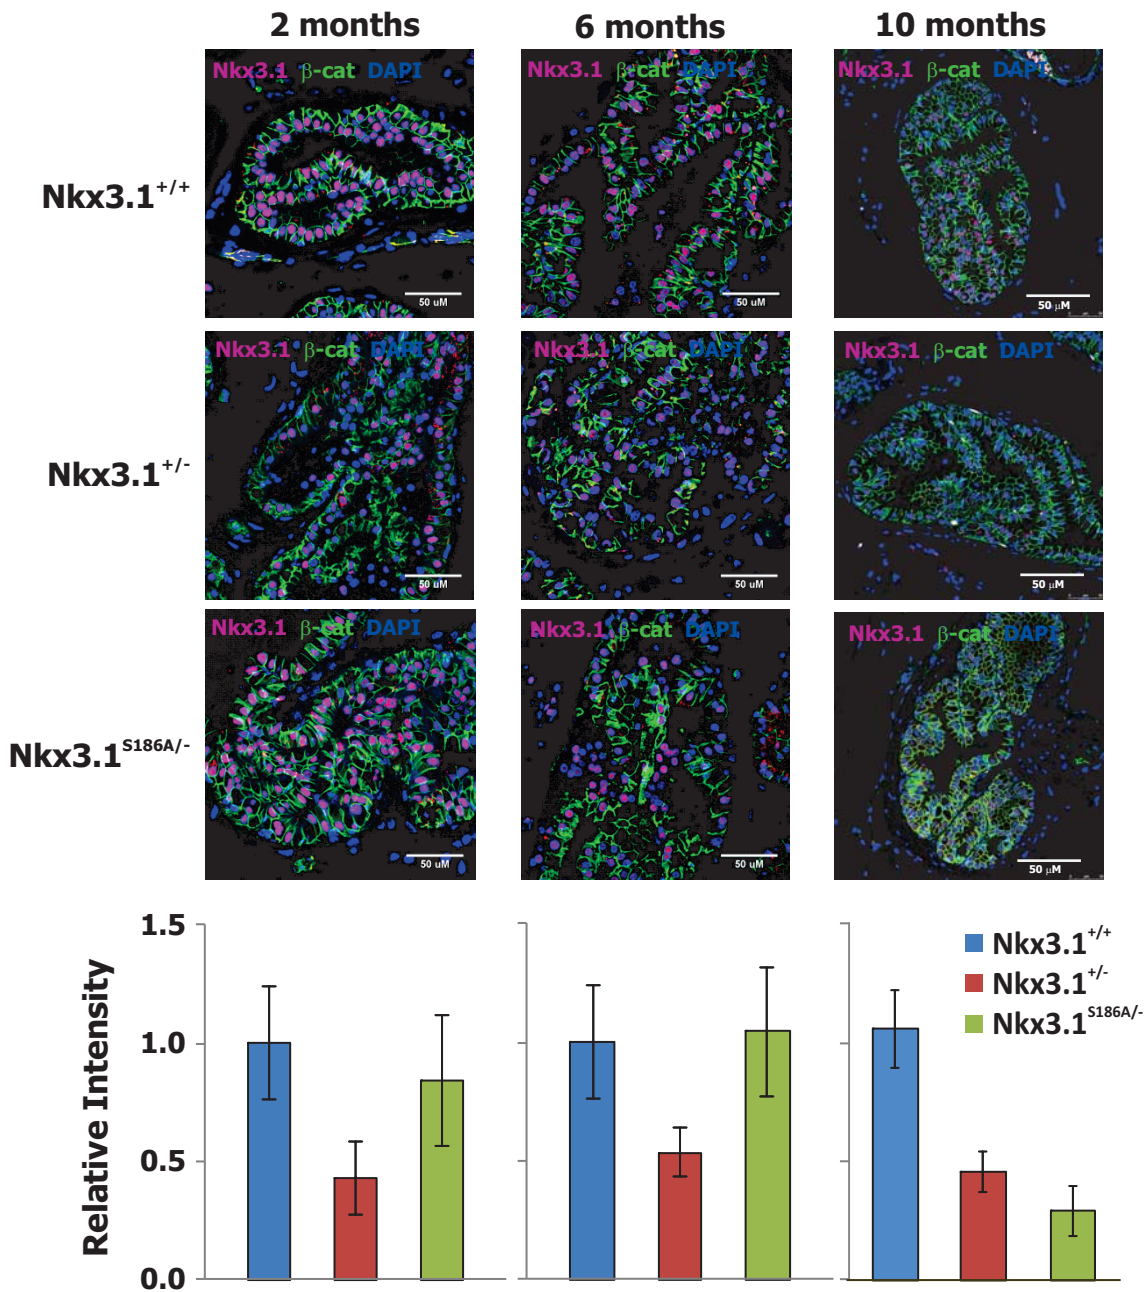

## Supplementary Fig 6

Cell proliferation. Immunostaining for Ki-67 was done with cytokeratin 8 and DAPI as counterstains in sections from DLP. Confocal images were quantitated with image J and the number of Ki-67-positive cells per field as a percentage of all nuclei in the field were recorded. The fraction of Ki-67 staining cells in  $Nkx3.1^{+/-}$  prostates differed from both  $Nkx3.1^{+/+}$  and  $Nkx3.1^{S186A/-}$  prostates at 6 months by t-test with  $p < 0.01$ .

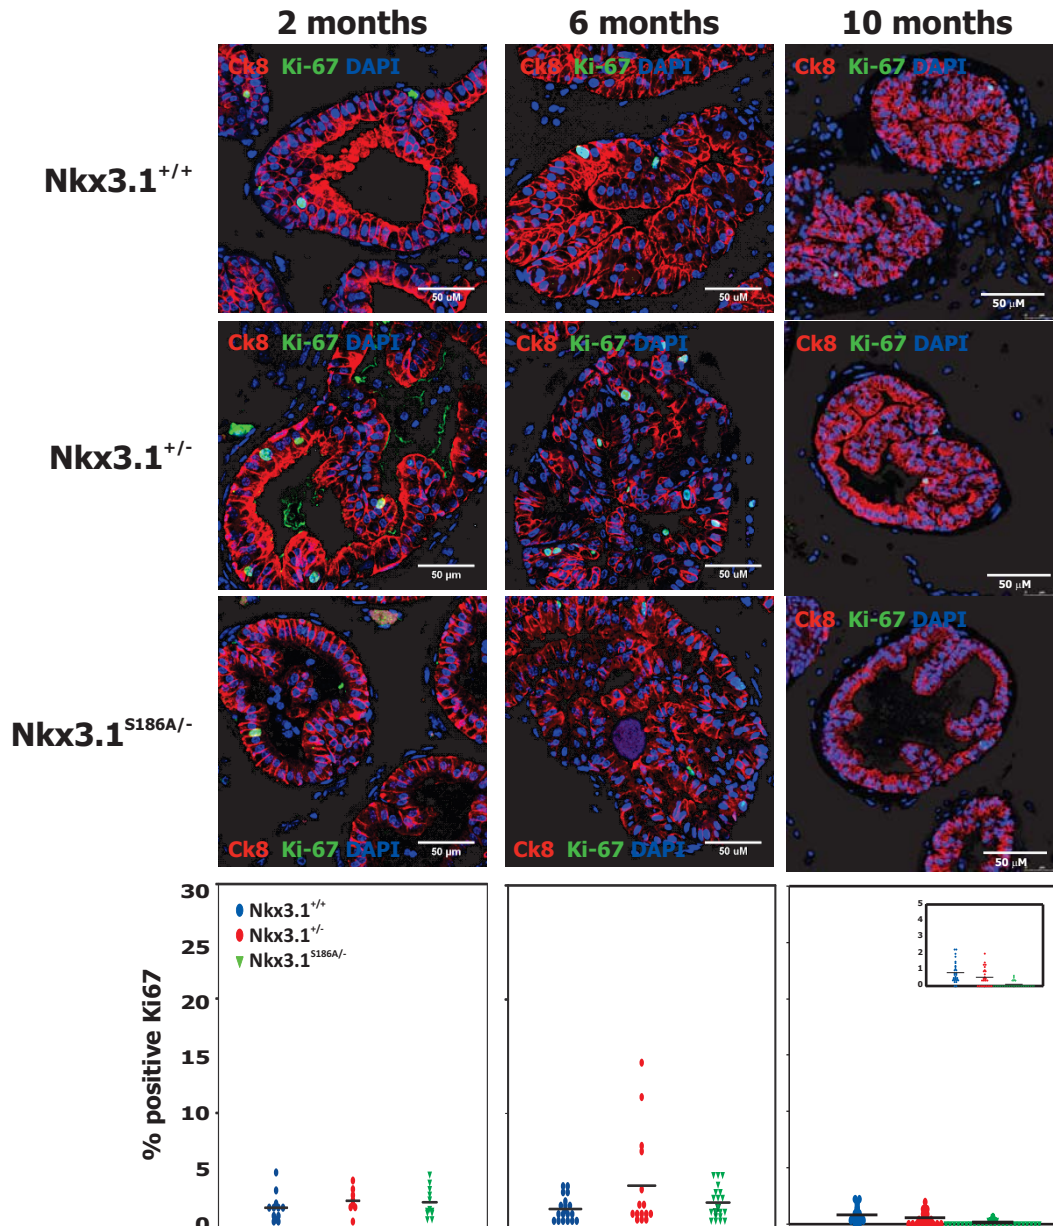



## Supplementary Figure 7

TUNEL staining was done on paraffin sections from dorsolateral prostate lobes of *Nkx3.1*<sup>+/+</sup>, *Nkx3.1*<sup>+/-</sup>, and *Nkx3.1*<sup>S186A/-</sup> mice at 2, 6, and 10 months of age. Counterstain was done with DAPI. Confocal images were quantitated with image J and the number of TUNEL-positive cells per field were recorded compared to the total number of nuclei seen in the field. *Nkx3.1*<sup>S186A/-</sup> mice differed from both *Nkx3.1*<sup>+/+</sup> and *Nkx3.1*<sup>+/-</sup> mice by t-test with  $p < 0.01$ .

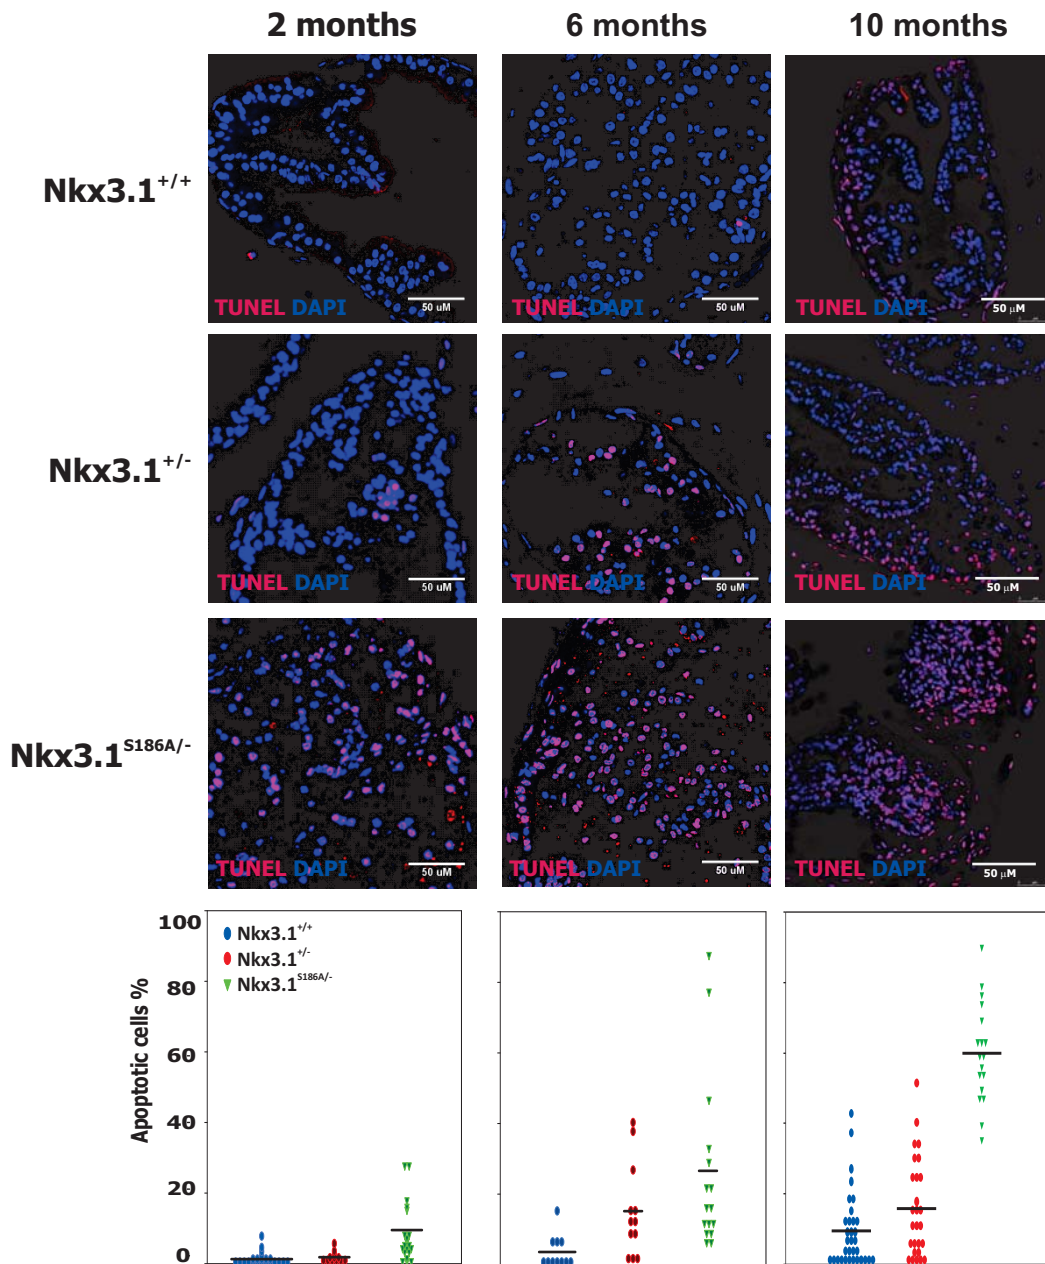

### Supplementary Figure 8

A. Cleaved caspase 3 staining was done on paraffin sections from both anterior and dorsolateral prostate lobes of  $Nkx3.1^{+/+}$ ,  $Nkx3.1^{+/-}$ , and  $Nkx3.1^{S186A/-}$  mice at 2, 6, and 10 months of age. Counterstain was done with DAPI.

B. Cleaved caspase 3 staining of prostates from  $Nkx3.1^{+/+}$  mice unirradiated and 2 hours after 15Gy irradiation.

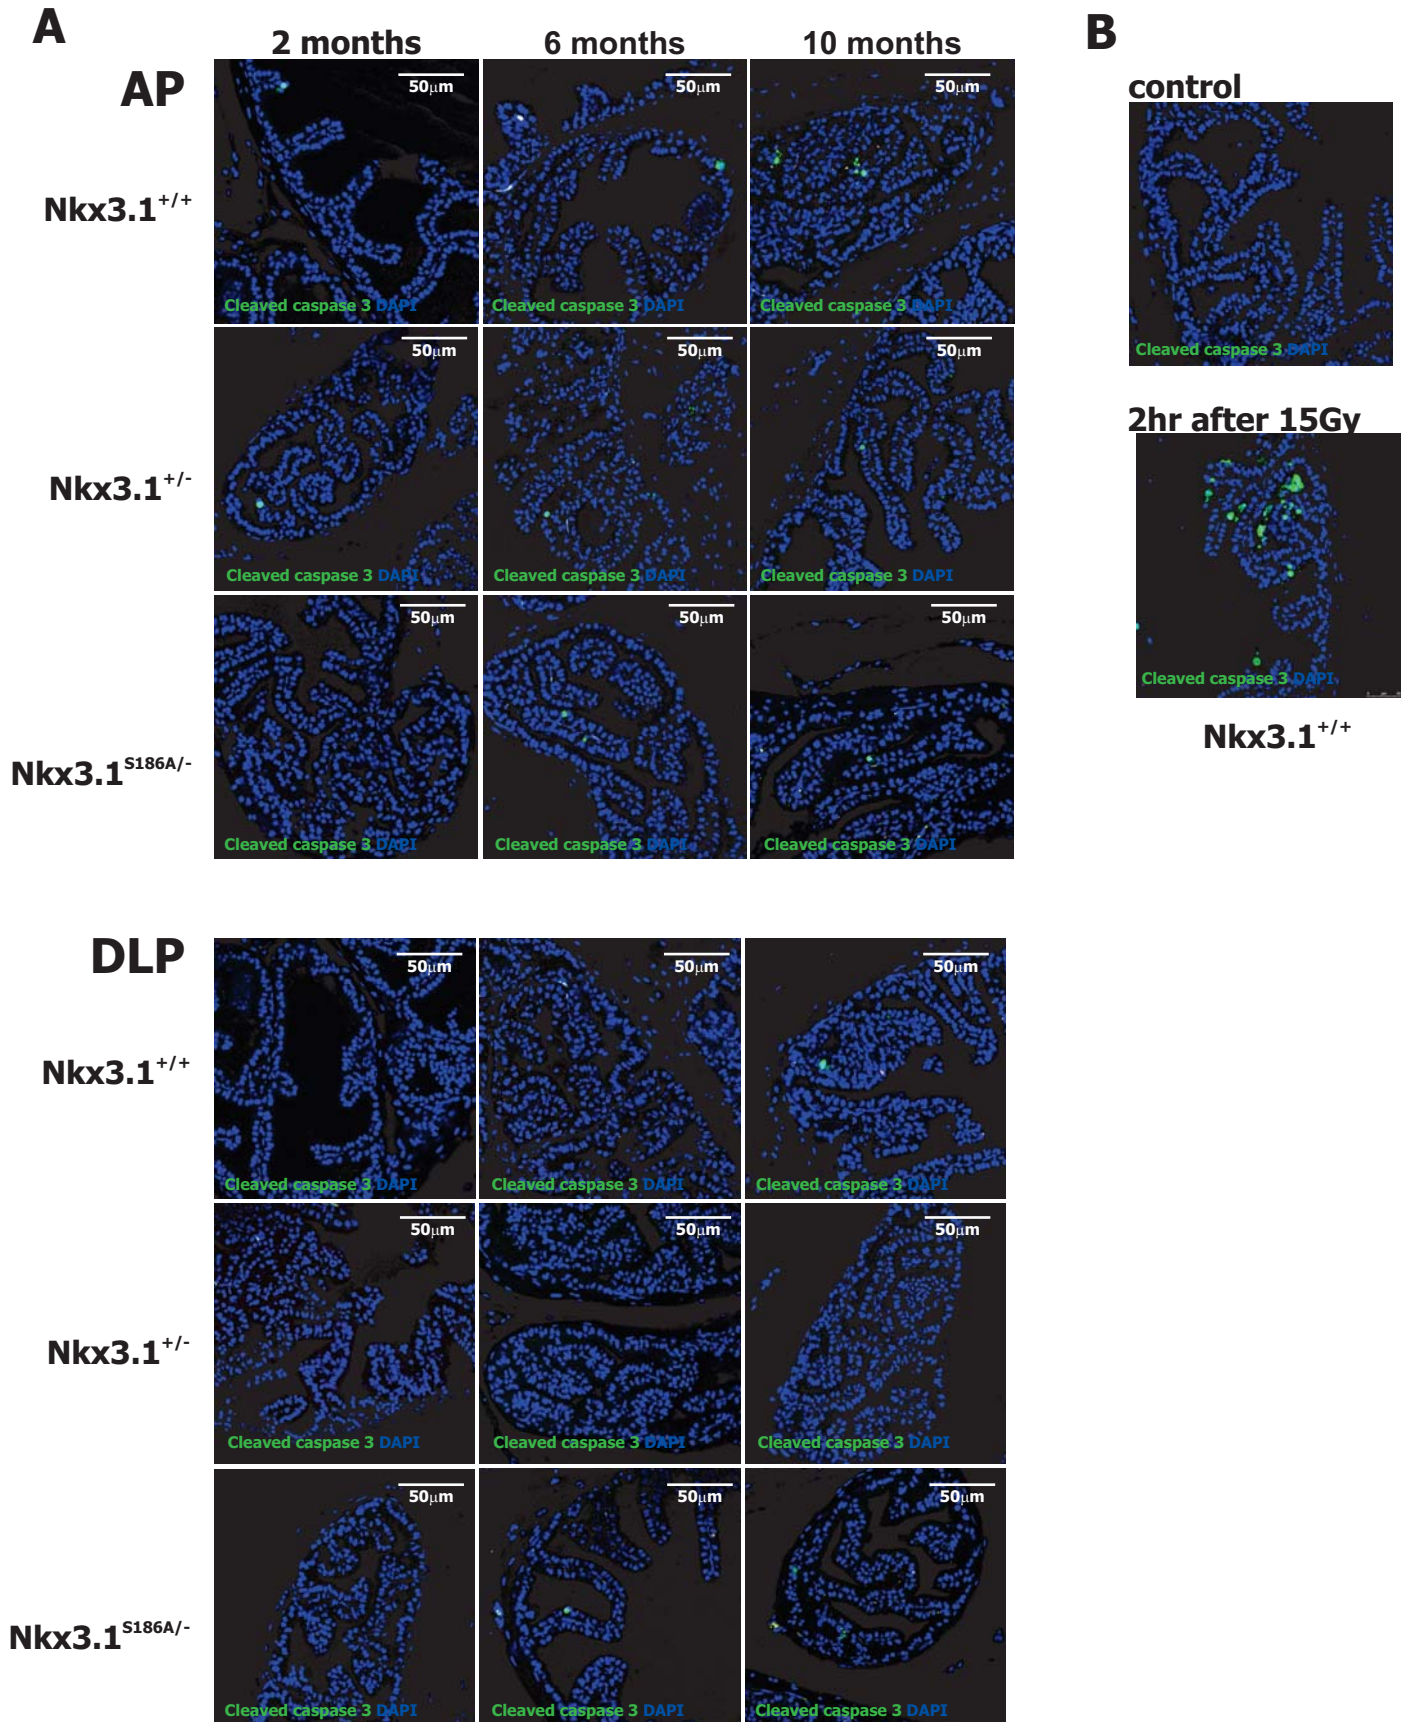

Supplement: NIHMS1631276-supplement-1.pdf [file NIHMS1631276-supplement-1.pdf]
